# Supplementary material
Source: MDPI journal article supplement (https://www.mdpi.com/2304-6740/11/1/46)
Supplement: s1 [file s1]

## Supplementary Materials

# Application of biobased substances in the synthesis of nanostructured magnetic core-shell materials

Marcos E. Peralta\*, Alejandro Koffman-Frischknecht, M. Sergio Moreno, Daniel O. Mártire, and Luciano Carlos\*

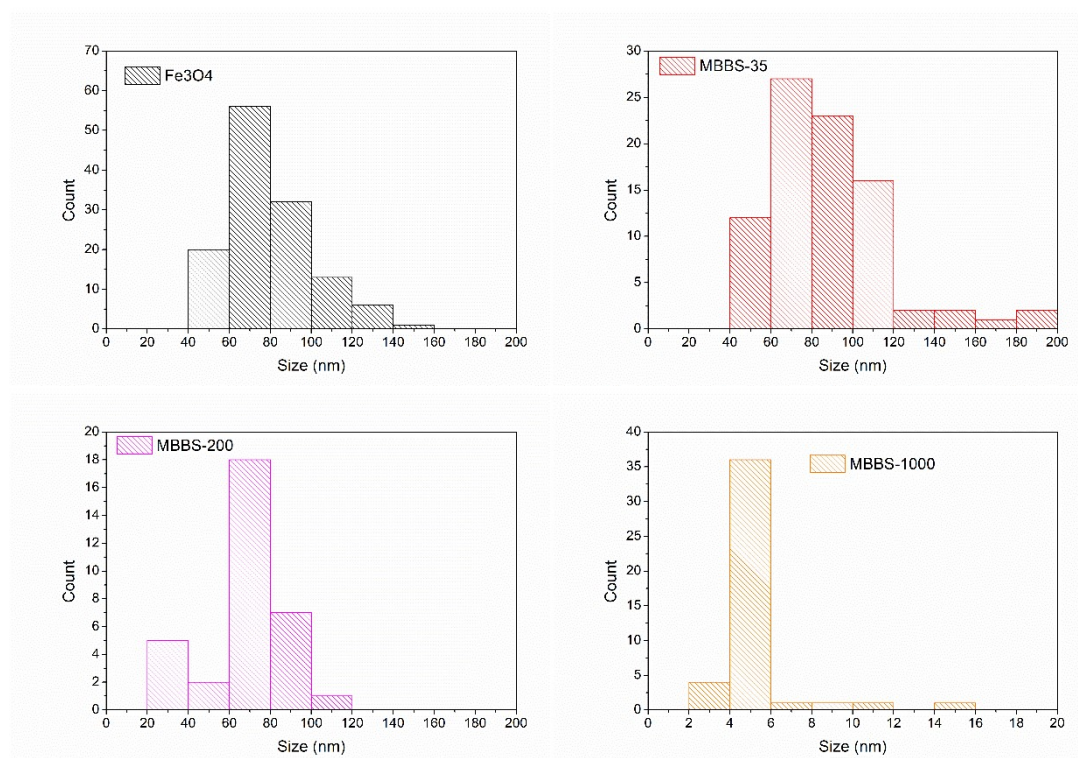

Figure S1. Particle size distribution obtained from TEM images.

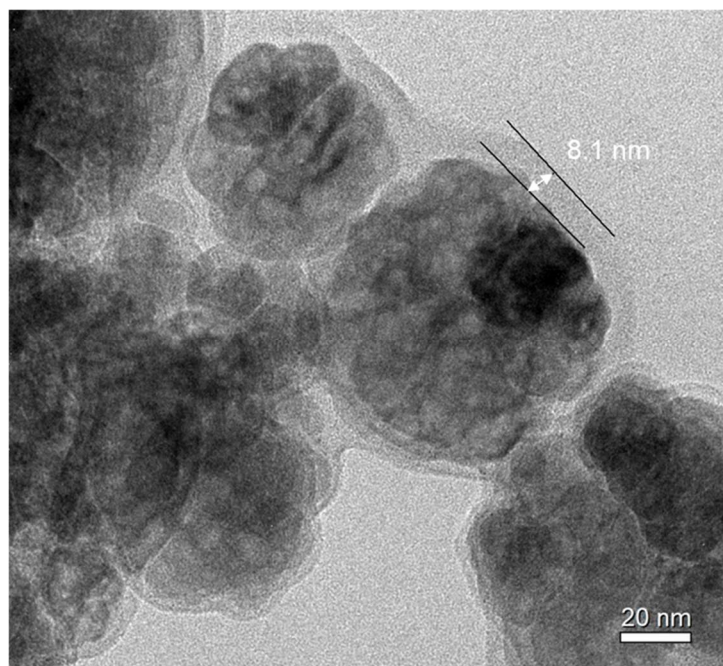

**Figure S2.** High resolution TEM image of MBBS-35

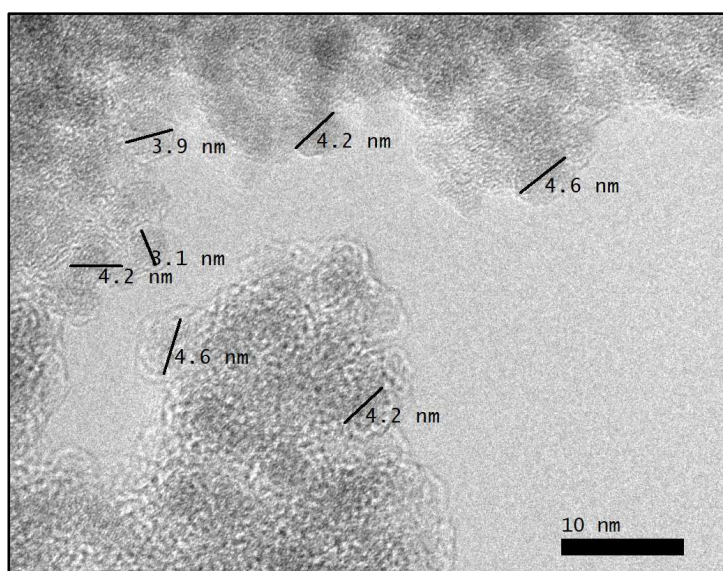

**Figure S3.** High resolution TEM image of MBBS-1000

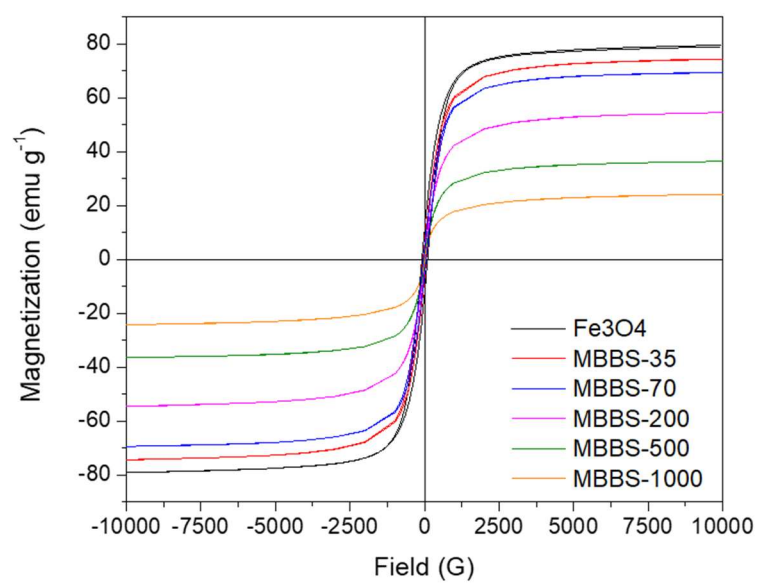

**Figure S4.** Magnetization curves (300 K) of Fe<sub>3</sub>O<sub>4</sub> and covered magnetite with different amount of BBS.

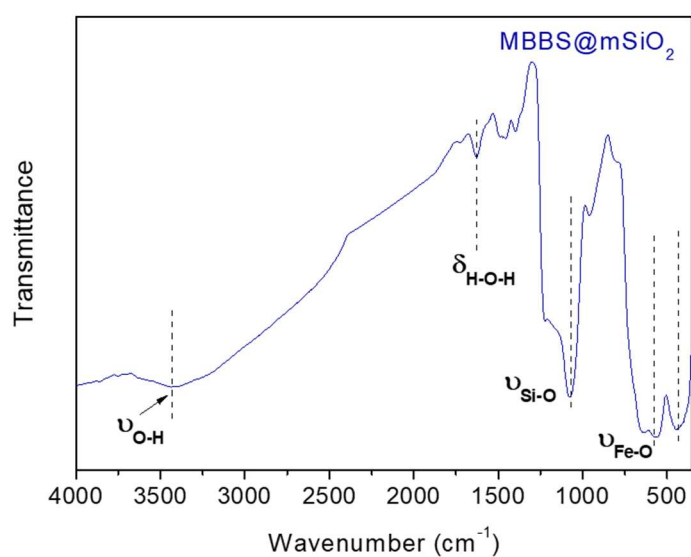

**Figure S5.** FTIR spectra of MBBS@mSiO<sub>2</sub> material

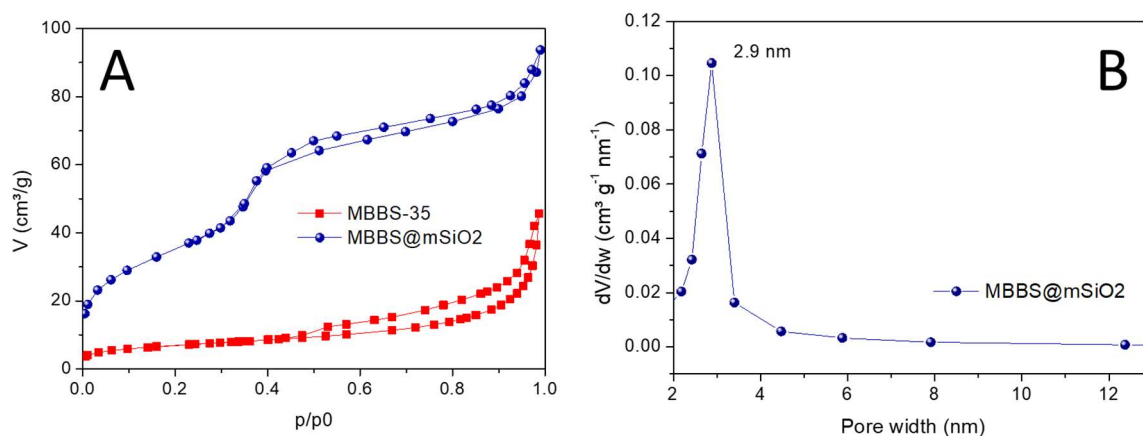

**Figure S6.** (A)  $N_2$  adsorption/desorption isotherms of MBBS-35 and of MBBS@SiO<sub>2</sub> (B) pore-size distribution of MBBS@SiO<sub>2</sub>

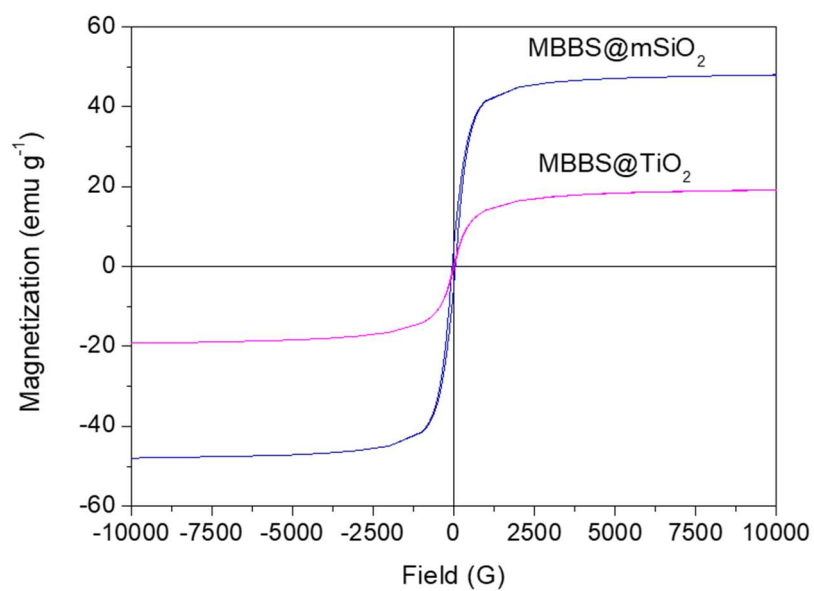

**Figure S7.** Magnetization curves at 300 K of MBBS@mSiO<sub>2</sub> and MBBS@TiO<sub>2</sub>

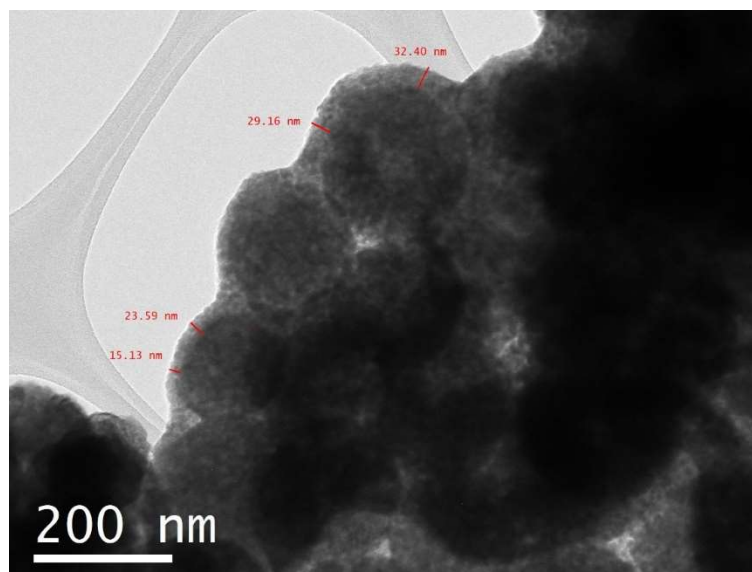

**Figure S8.** High resolution TEM image of MBBS@TiO<sub>2</sub>. Red lines indicate the thickness of TiO<sub>2</sub> layer.

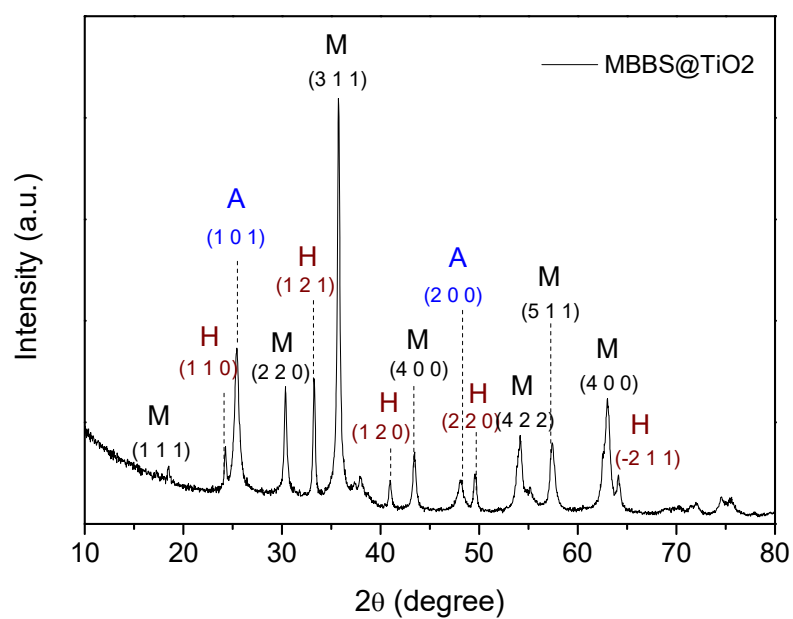

**Figure S9.** XRD diffraction pattern of MBBS@TiO<sub>2</sub>. M (Magnetite), A (Anatase), and H (Hematite).



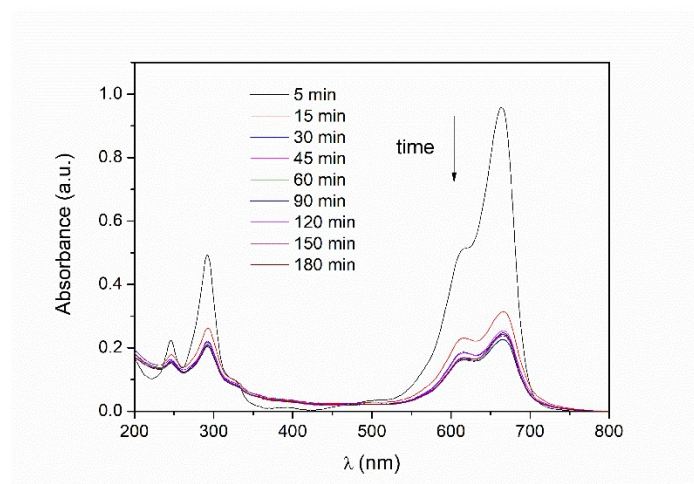

**Figure S10.** UV-Vis absorption spectra of aqueous solutions of MB at different contact times using MBBS@mSiO<sub>2</sub> as adsorbent. ([MB]<sub>0</sub> = 10 mg L<sup>-1</sup>; MBBS@mSiO<sub>2</sub> dosage = 500 mg L<sup>-1</sup>, T = 25 °C pH = 6.0).

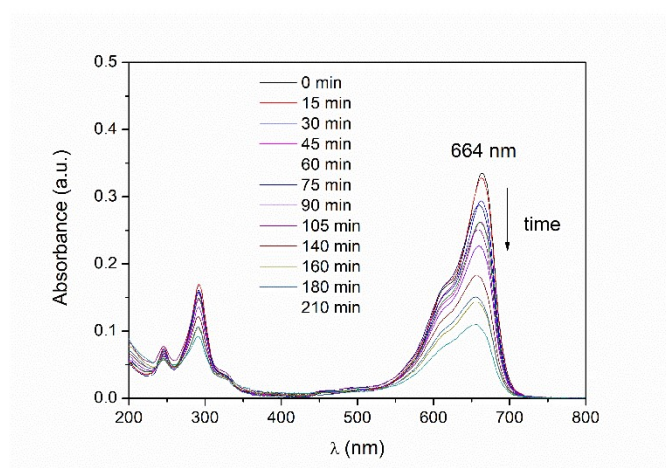

**Figure S11.** UV-Vis absorption spectra of aqueous solutions of MB at different irradiation times using MBBS@TiO<sub>2</sub> as photocatalyst. ([MB]<sub>0</sub> = 5 mg L<sup>-1</sup>; load MBBS@TiO<sub>2</sub> = 120 mg L<sup>-1</sup>; load TiO<sub>2</sub> = 40 mg L<sup>-1</sup>; pH = 6).

**Table S1.** Total mass loss calculated by TGA for MBBS-X samples

| Sample                         | Total mass loss (%) |
|--------------------------------|---------------------|
| Fe <sub>3</sub> O <sub>4</sub> | 2.8                 |
| MBBS-35                        | 5.2                 |
| MBBS-70                        | 9.7                 |
| MBBS-200                       | 23.7                |
| MBBS-500                       | 36.3                |
| MBBS-1000                      | 47.2                |

**Table S2.** Magnetic properties of BBS coated magnetic iron oxide nanoparticles

| Sample                         | Magnetic saturation<br>(emu g <sup>-1</sup> ) | Coercivity<br>(G) | Magnetic remanence<br>(emu g <sup>-1</sup> ) |
|--------------------------------|-----------------------------------------------|-------------------|----------------------------------------------|
| Fe <sub>3</sub> O <sub>4</sub> | 79.5                                          | 96.0              | 11.5                                         |
| MBBS-35                        | 75.4                                          | 57.0              | 6.3                                          |
| MBBS-70                        | 70.3                                          | 46.8              | 4.7                                          |
| MBBS-200                       | 56.1                                          | 19.8              | 2.0                                          |
| MBBS-500                       | 37.3                                          | 14.1              | 1.2                                          |
| MBBS-1000                      | 25.1                                          | 2.4               | 0.3                                          |
| MBBS@mSiO <sub>2</sub>         | 48.6                                          | 51.8              | 4.7                                          |
| MBBS@TiO <sub>2</sub>          | 19.7                                          | 20.0              | 0.6                                          |

**Table S3.** Zeta potential measurements of BBS coated magnetic iron oxide nanoparticles

| Sample                         | pH 3 | pH 6  | pH 10 |
|--------------------------------|------|-------|-------|
| Fe <sub>3</sub> O <sub>4</sub> | 41,8 | 10,1  | -7,5  |
| MBBS-35                        | 24,3 | -23,5 | -27   |
| MBBS-70                        | 4,9  | -31,2 | -41,7 |
| MBBS-200                       | -0,3 | -33,1 | -44,5 |
| MBBS-500                       | -5,3 | -35,9 | -45,7 |
| MBBS-1000                      | -7,9 | -25,7 | -49,3 |

**Table S4: Chemical composition of BBS <sup>(a)</sup>.**

|                                                                                                                      |              |              |             |                                                               |                         |                             |
|----------------------------------------------------------------------------------------------------------------------|--------------|--------------|-------------|---------------------------------------------------------------|-------------------------|-----------------------------|
| Metal analysis                                                                                                       |              |              |             |                                                               |                         |                             |
| Si (%)                                                                                                               | Fe (%)       | Al (%)       | Mg (%)      | Ca (%)                                                        | K (%)                   | Na (%)                      |
| 12.14 ± 0.07                                                                                                         | 1.03 ± 0.02  | 0.59 ± 0.01  | 1.67 ± 0.25 | 4.86 ± 0.61                                                   | 1.18 ± 0.07             | 0.06 ± 0.01                 |
| Microelements                                                                                                        |              |              |             |                                                               |                         |                             |
| Cu (ppm)                                                                                                             | Ni (ppm)     | Zn (ppm)     | Cr (ppm)    | Pb (ppm)                                                      | Cd (ppm)                | Hg (ppm)                    |
| 73 ± 1                                                                                                               | 100 ± 3      | 157 ± 13     | 49 ± 1      | 43 ± 2                                                        | < 0.02                  | < 0.02                      |
| General characteristics                                                                                              |              |              |             | Characteristics in aqueous solution<br>(3 g L <sup>-1</sup> ) |                         |                             |
| Moisture<br>(%)                                                                                                      | Ashes<br>(%) | C<br>(%)     | N<br>(%)    | pH                                                            | Conductivity<br>(μS/cm) | Surface<br>tension<br>(N/m) |
| 3.69                                                                                                                 | 31.2         | 39.94 ± 0.35 | 4.82 ± 0.14 | 9.02                                                          | 429                     | 56.8                        |
| Concentration values as mole fraction of total C for functional groups and C types in by NMR analysis <sup>(b)</sup> |              |              |             |                                                               |                         |                             |
| Aliph<br>0.31                                                                                                        | NR<br>0.07   | COOH<br>0.12 | OR<br>0.20  | Ph<br>0.16                                                    | PhOH<br>0.06            | Kt<br>0.02                  |

<sup>(a)</sup> From Nisticò, R. et al. From biowaste to magnet-responsive materials for water remediation from polycyclic aromatic hydrocarbons, Chemosphere. 202 (2018) 686–693.

<sup>(b)</sup> Legends: aliph = aliphatic groups, NR = amino groups, COOH = carboxylic acids, OR = alcoxy groups, Ph = aromatic phenyl groups, PhOH = phenoxy groups, Kt = ketones.
